# Supplementary material for: Combination Effects of Integrin-linked Kinase and Abelson Kinase Inhibition on Aberrant Mitosis and Cell Death in Glioblastoma Cells
Source: MDPI journal article supplement (doi:10.3390/biology12070906), 2023-06-25
Supplement: s1 [file s1]

Supplementary Figure S1

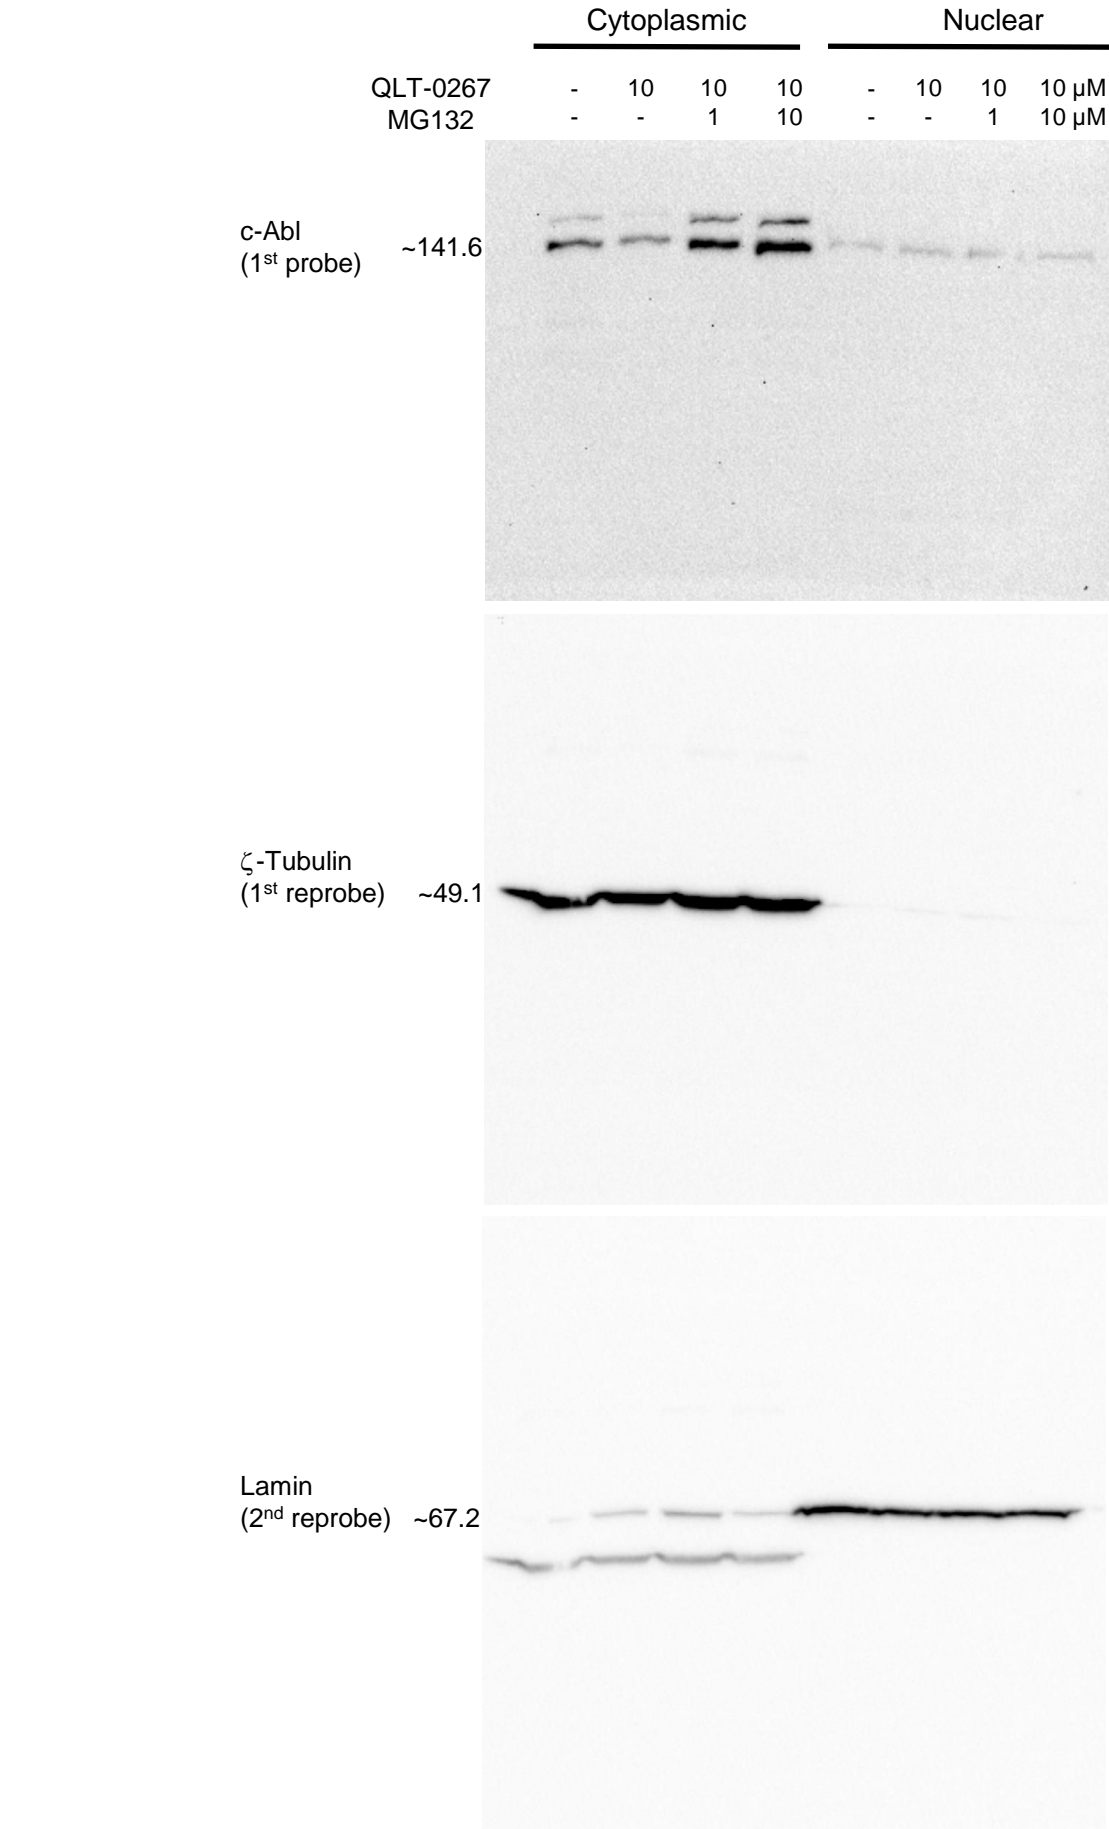

**Supplementary Figure S1. The ILK Inhibitor QLT-0267 Decreases ABL in the Cytosolic Fraction and the Proteasome Inhibitor MG132 Rescues These Effects in T98G Cells.** T98G glioblastoma cells were exposed to either DMSO or 10  $\mu$ M QLT-0267 alone or together with 1  $\mu$ M or 10  $\mu$ M MG132 for 6 hours. Western blot analysis was performed following drug exposure, cell lysis and fractionation. Increasing amounts of MG132 in the presence of QLT-0267 rescued cytoplasmic ABL levels. ABL levels were determined using a rabbit antibody (Cell Signalling Cat #2862). The purity of cellular fractions was verified by reprobing the blots for tubulin, a primarily cytosolic protein (using a mouse  $\alpha$ -tubulin antibody; Sigma Cat #T6199 ) or lamin, a primarily nuclear protein (using a rabbit  $\alpha$ -lamin B1 antibody; Abcam Cat #ab16048). The additional lower weight molecular bands seen in the lamin Western blot are likely due to incomplete stripping of the  $\alpha$ -tubulin antibody following the first reprobe.
